# Supplementary material for: Cooperation between holey N-doped carbon and Ni nanoparticles as an efficient electrocatalyst for the hydrogen evolution reaction
Source: Royal Society of Chemistry journal article supplement (doi:10.1039/d4cp02186j), 2024-01-01
Supplement: d4cp02186j1.pdf [file d4cp02186j1.pdf]

# **Cooperation between holey N-doped carbon and Ni nanoparticles as efficient electrocatalyst for hydrogen evolution reaction**

Wenchong Zhang<sup>#</sup>, Heng Ke<sup>#</sup>, Mixue Gong, Jie Yang, Ningbo Yu, Yanan Xue,  
Jianzhi Wang<sup>\*</sup>, Faquan Yu<sup>\*</sup>

<sup>#</sup> These authors contributed equally to this work.

Key Laboratory for Green Chemical Process of Ministry of Education,  
Hubei Key Laboratory for Novel Reactor and Green Chemistry Technology  
Hubei Engineering Research Center for Advanced Fine Chemicals  
School of Chemical Engineering and Pharmacy,  
Wuhan Institute of Technology, Wuhan 430073, China

<sup>\*</sup>Corresponding author: Jianzhi Wang, PhD; Faquan Yu, Professor

Wuhan Institute of Technology

LiuFang Campus, No.206, Guanggu 1st road, Wuhan 430205, Hubei, China

E-mail address: wangjz15@163.com; fyuwit.edu.cn

Tel: (86-27) 87194980; Fax: (86-27) 87194465

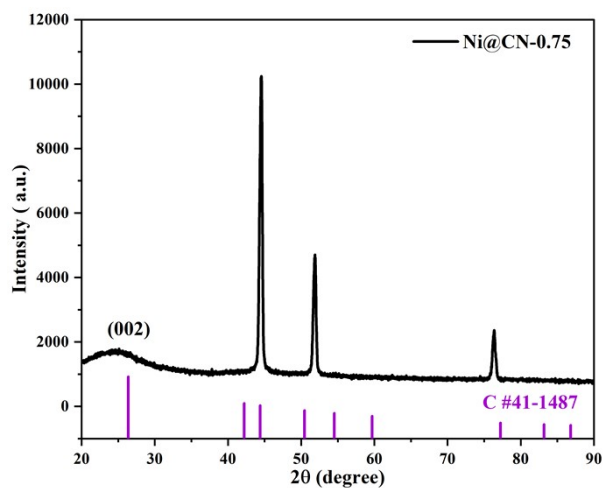

**Figure S1.** XRD pattern of Ni@CN-0.75.

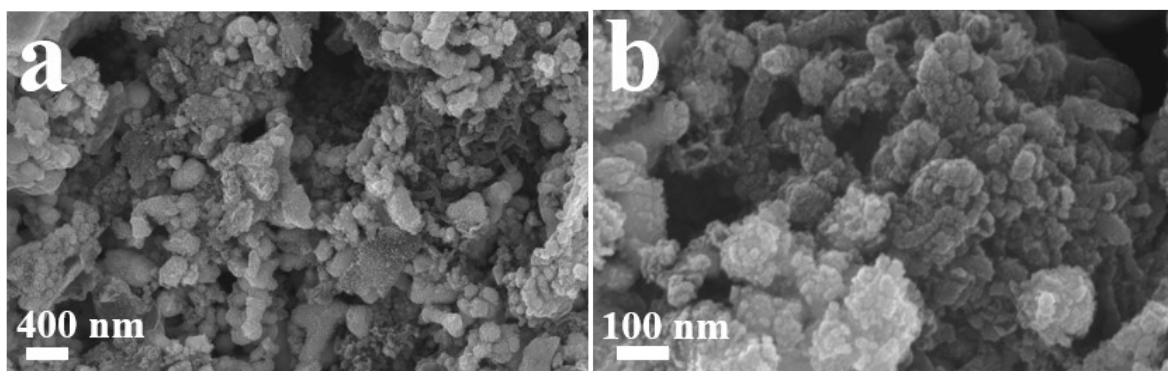

**Figure S2.** SEM images with Ni (a-b).

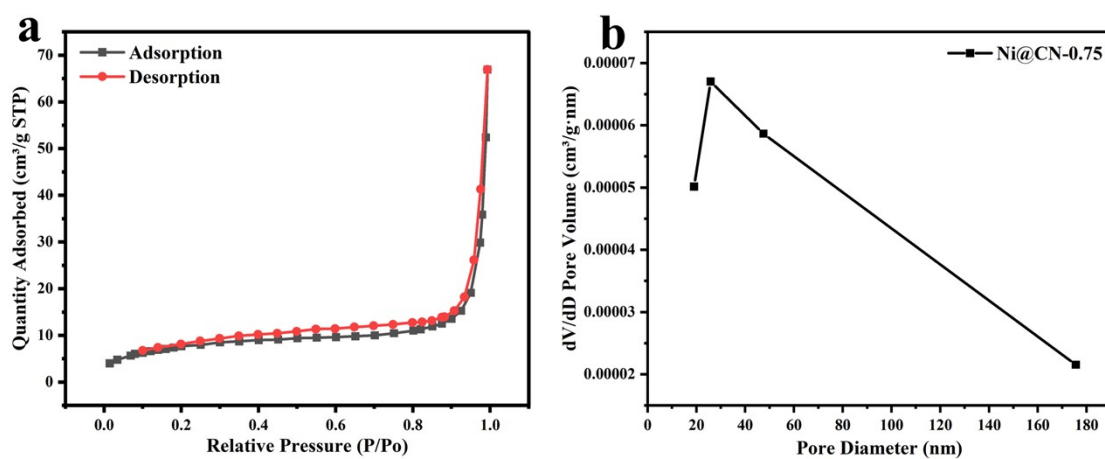

**Figure S3.** N<sub>2</sub> adsorption/desorption isotherms of Ni@CN(a). BJH pore size distribution curves of Ni@CN(b).

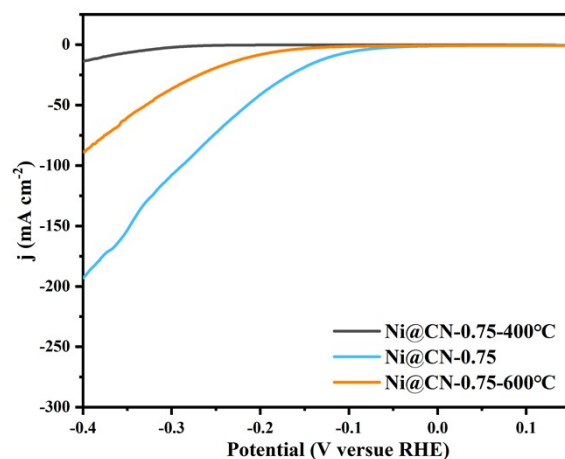

Figure S4. LSV curves of Ni@CN-0.75 with different calcination temperature.

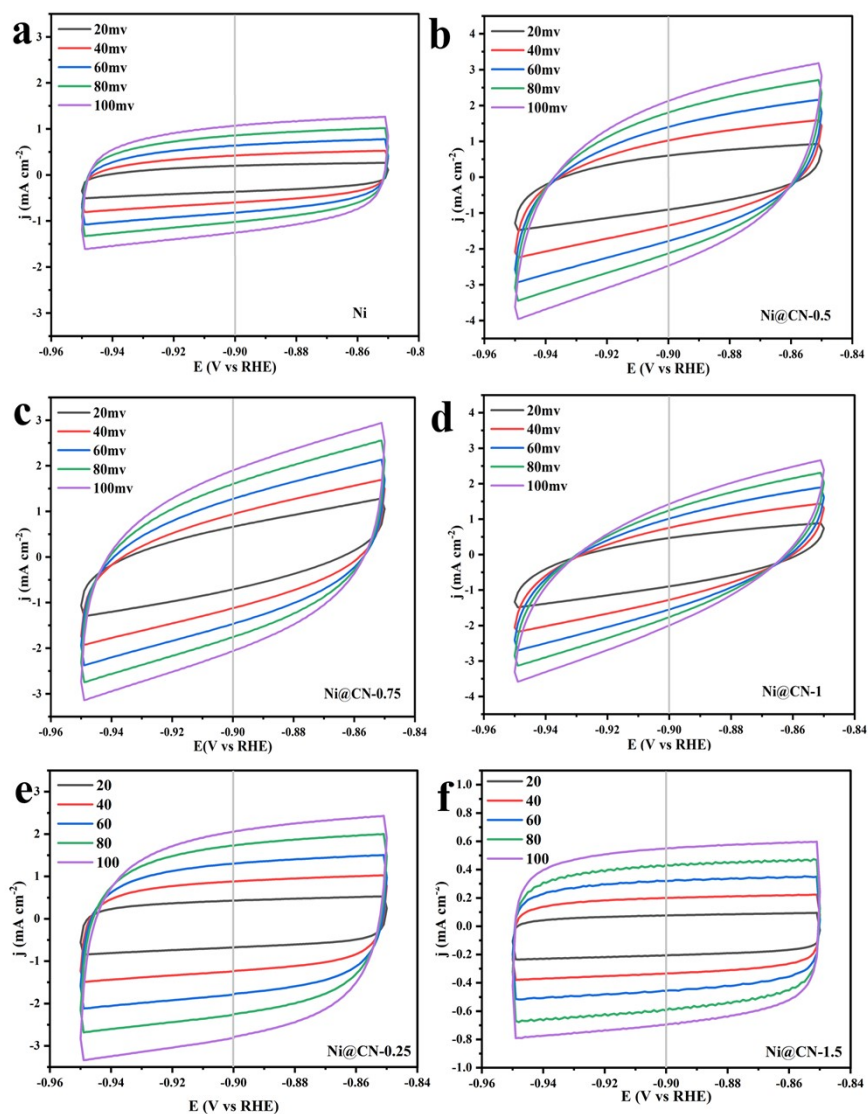

Figure S5. CV curves of Ni (a), Ni@CN-0.5(b), Ni@CN-0.75(c) and Ni@CN-1 (d) in 1.0 M

KOH solution with various scan rates.

**Table S1.** Comparison of hydrogen evolution performance with nickel-based catalyst.

| Catalyst                                        | Substrate | Electrolyte      | $\eta_{10}$<br>(mV) | Tafel Slope<br>(mV dec <sup>-1</sup> ) | Ref.                 |
|-------------------------------------------------|-----------|------------------|---------------------|----------------------------------------|----------------------|
| Ni@NC-800                                       | GC        | 1.0 M KOH        | 205                 | 160                                    | [1]                  |
| Ni/NC-0.35                                      | GC        | 1.0 M KOH        | 133                 | 109                                    | [2]                  |
| NV-Ni/CP                                        | GC        | 1.0 M KOH        | 95                  | 140                                    | [3]                  |
| Ni <sub>2</sub> P/NC-60                         | GC        | 1.0 M KOH        | 108                 | 67.3                                   | [4]                  |
| Ni/C-2                                          | GC        | 1.0 M KOH        | 94                  | 52                                     | [5]                  |
| NNG 12 (12 Wt%<br>Ni)                           | GC        | 1.0 M KOH        | 280                 | -                                      | [6]                  |
| Mo <sub>2</sub> C/Ni-CN                         | GC        | 1.0 M KOH        | 170                 | 64                                     | [7]                  |
| Ni@CNTs-650°                                    | GC        | 1.0 M KOH        | 266                 | 102                                    | [8]                  |
| Ni <sub>3</sub> S <sub>2</sub> /VS <sub>2</sub> | GC        | 1.0 M KOH        | 151                 | 59.9                                   | [9]                  |
| <b>Ni@CN-0.75</b>                               | <b>GC</b> | <b>1.0 M KOH</b> | <b>121</b>          | <b>121.4</b>                           | <b>This<br/>work</b> |

## Reference

- [1] Y. Xu, W. Tu, B. Zhang, S. Yin, Y. Huang, M. Kraft and R. J. A. M. Xu, 2017, **29**.
- [2] Q. Wang, T. Sun and B. J. A. S. S. Xue, 2021, **564**, 150439.
- [3] R. Tong, Z. Sun, F. Zhang, X. Wang, J. Xu, X. Shi, S. Wang, H. J. A. S. C. Pan and

Engineering, 2018, **6**, 16525-16531.

[4] F. Yang, S. Huang, B. Zhang, L. Hou, Y. Ding, W. Bao, C. Xu, W. Yang and Y. J. N. Li, 2019, **9**, 1022.

[5] J. Ding, S. Ji, H. Wang, V. Linkov, H. Gai, F. Liu, Q. Liu, R. J. A. S. C. Wang and Engineering, 2019, **7**, 3974-3981.

[6] W. Zhang, W. Li, Y. Li, S. Peng and Z. J. C. T. Xu, 2019, **335**, 326-332.

[7] Y. Xu, J. Wang, Z. Liu, Z. Zhai, B. Ren, X. Dong, J. Miao, L. Zhang and Z. J. E. A. Liu, 2020, **354**, 136617.

[8] C. J. Oluigbo, M. Xie, N. Ullah, S. Yang, W. Zhao, M. Zhang, X. Lv, Y. Xu and J. J. I. j. o. h. e. Xie, 2019, **44**, 2685-2693.

[9] X. Zhong, J. Tang, J. Wang, M. Shao, J. Chai, S. Wang, M. Yang, Y. Yang, N. Wang and S. J. E. A. Wang, 2018, **269**, 55-61.
